# Supplementary material
Source: MDPI journal article supplement (https://www.mdpi.com/2073-4441/13/19/2700)
Supplement: s1 [file s1]

Archive with 2 entries (2 files):
- Suppl File S1.xlsx
- water-1371252-suppl Table S2.pdf
