# Supplementary material
Source: MDPI journal article supplement (https://www.mdpi.com/2073-4441/13/19/2700)
Supplement: s1 [file s1 › Suppl File S1.xlsx]

## Sheet: Salinity experiment - Trial 1
Supplemental File S1. This file contains the raw data and outcomes of statistical tests pertaining to the cultvation experiments described in the main article.
Data from PW growth salinity experiment - Trial 1
Log2 of F0 values measured with Pulsed-Amplitude-Modulation fluorometry
Strain Pt1	Day	0 psu		5 psu		10 psu		15 psu		25 psu		31 psu				Strain Pt4	Day	0 psu		5 psu		10 psu		15 psu		25 psu		31 psu
		Rep 1	Rep 2	Rep 1	Rep 2	Rep 1	Rep 2	Rep 1	Rep 2	Rep 1	Rep 2	Rep 1	Rep 2					Rep 1	Rep 2	Rep 1	Rep 2	Rep 1	Rep 2	Rep 1	Rep 2	Rep 1	Rep 2	Rep 1	Rep 2
	1	7.72792	7.64386	8.10852	8.05528	8.40514	8.43463	8.53916	8.47167	8.45943	8.55459	8.27612	8.3837				1	7.62936	7.62936	7.87036	7.87652	8.00563	8	8.09276	8.02791	8.15482	8.10329	7.98299	8.08746
	2	7.7211	7.8009	8.8857	8.94544	9.45738	9.53333	9.70217	9.65105	9.64566	9.67419	9.50184	9.47573				2	7.70044	7.71425	8.31741	8.33092	8.96578	8.90388	9.09276	8.92184	8.92481	9.00843	8.75489	8.79766
	3	7.75489	7.82655	10.0498	10.1699	11.0182	11.1941	11.4105	11.5023	11.2773	11.3117	11.236	11.0921				3	7.70044	7.70044	9.33985	9.48784	10.2703	10.2703	10.6466	10.4094	10.2597	10.2562	10.0375	9.97442
	4	8.01681	8.04985	11.4466	11.6573	12.6001	12.6448	12.9357	12.9885	12.8366	12.9116	12.7507	12.5541				4	7.69349	7.77479	10.6202	10.8321	11.8174	11.8333	12.263	11.9972	11.7356	11.7228	11.5367	11.3945
	5	8.49985	8.40088	12.8682	12.887	13.5697	13.6302	13.8075	13.827	13.7877	13.7877	13.744	13.6485				5	7.72792	8.20457	12.2393	12.4494	13.4449	13.4822	13.8334	13.6338	13.1726	13.2707	13	12.9654
	8	11.0042	10.6662	13.9387	13.9085	14.1209	14.356	14.2684	14.17	14.2707	14.2541	14.4554	14.3826				8	9.29921	10.9542	14.1418	14.3515	14.3913	14.5046	14.3804	14.3826	14.2989	14.376	14.0257	14.0424
Exp. Phase range used for calc. of doubling time (day)				2-5	2-4	2-4	2-4	2-4	2-4	2-4	2-4	2-4	2-4			Exp. Phase range used for calc. of doubling time (day)				2-5	2-5	2-5	2-5	2-5	2-5	2-5	2-5	2-5	2-5
Doubling time (k; slope of linear Log2 increase)				1.3344	1.3559	1.5714	1.5557	1.6168	1.6687	1.5955	1.6187	1.6244	1.5392			Doubling time (k; slope of linear Log2 increase)				1.3046	1.37	1.4984	1.5298	1.5838	1.5724	1.4219	1.425	1.4235	1.3923
R-squared				0.9979	0.9969	1	0.9985	0.9989	0.996	0.9998	1	0.9985	0.9992			R-squared				0.9896	0.9943	0.9976	0.9982	0.999	0.9995	0.9996	0.9977	0.9989	0.996
		doubling time (k)				max. growth rate (µ)				log2 of µ
		Pt1		Pt4		Pt1		Pt4		Pt1		Pt4
	5	1.3344	1.3559	1.3046	1.37	0.924936	0.939838	0.90428	0.949612	-0.112575	-0.0895156	-0.145159	-0.0745905
	10	1.5714	1.5557	1.4984	1.5298	1.08921	1.07833	1.03861	1.06038	0.123284	0.108798	0.0546564	0.0845767
	15	1.6168	1.6687	1.5838	1.5724	1.12068	1.15665	1.09781	1.0899	0.164375	0.209958	0.134624	0.124202
	25	1.5955	1.6187	1.4219	1.425	1.10592	1.122	0.985586	0.987735	0.145242	0.166069	-0.0209464	-0.0178045
	31	1.6244	1.5392	1.4235	1.3923	1.12595	1.06689	0.986695	0.965069	0.171141	0.0934143	-0.0193239	-0.0512963
	Post-hoc 2-way ANOVA multiple comparisons test with Bonferroni's correction
	psu:strain vs. psu:strain	Mean Diff.	95.00% CI of diff.	Below threshold?	Summary	Adjusted P Value	Mean 1	Mean 2	Mean Diff.	SE of diff.	N1	N2	t	DF
	5:Pt1 vs. 5:Pt4	0.008825	-0.1202 to 0.1379	No	ns	>0.9999	-0.1011	-0.1099	0.008825	0.02856	2	2	0.309	10
	5:Pt1 vs. 10:Pt1	-0.2171	-0.3461 to -0.08805	Yes	***	0.0008	-0.1011	0.116	-0.2171	0.02856	2	2	7.602	10
	5:Pt1 vs. 10:Pt4	-0.1707	-0.2997 to -0.04163	Yes	**	0.0061	-0.1011	0.06962	-0.1707	0.02856	2	2	5.976	10
	5:Pt1 vs. 15:Pt1	-0.2882	-0.4173 to -0.1592	Yes	****	<0.0001	-0.1011	0.1872	-0.2882	0.02856	2	2	10.09	10
	5:Pt1 vs. 15:Pt4	-0.2305	-0.3595 to -0.1014	Yes	***	0.0005	-0.1011	0.1294	-0.2305	0.02856	2	2	8.07	10
	5:Pt1 vs. 25:Pt1	-0.2567	-0.3857 to -0.1277	Yes	***	0.0002	-0.1011	0.1557	-0.2567	0.02856	2	2	8.989	10
	5:Pt1 vs. 25:Pt4	-0.08168	-0.2107 to 0.04736	No	ns	0.7631	-0.1011	-0.01938	-0.08168	0.02856	2	2	2.86	10
	5:Pt1 vs. 31:Pt1	-0.2333	-0.3624 to -0.1043	Yes	***	0.0004	-0.1011	0.1323	-0.2333	0.02856	2	2	8.17	10
	5:Pt1 vs. 31:Pt4	-0.06574	-0.1948 to 0.06330	No	ns	>0.9999	-0.1011	-0.03531	-0.06574	0.02856	2	2	2.302	10
	5:Pt4 vs. 10:Pt1	-0.2259	-0.3550 to -0.09688	Yes	***	0.0006	-0.1099	0.116	-0.2259	0.02856	2	2	7.911	10
	5:Pt4 vs. 10:Pt4	-0.1795	-0.3085 to -0.05045	Yes	**	0.0041	-0.1099	0.06962	-0.1795	0.02856	2	2	6.285	10
	5:Pt4 vs. 15:Pt1	-0.297	-0.4261 to -0.1680	Yes	****	<0.0001	-0.1099	0.1872	-0.297	0.02856	2	2	10.4	10
	5:Pt4 vs. 15:Pt4	-0.2393	-0.3683 to -0.1103	Yes	***	0.0004	-0.1099	0.1294	-0.2393	0.02856	2	2	8.379	10
	5:Pt4 vs. 25:Pt1	-0.2655	-0.3946 to -0.1365	Yes	***	0.0001	-0.1099	0.1557	-0.2655	0.02856	2	2	9.298	10
	5:Pt4 vs. 25:Pt4	-0.0905	-0.2195 to 0.03854	No	ns	0.4502	-0.1099	-0.01938	-0.0905	0.02856	2	2	3.169	10
	5:Pt4 vs. 31:Pt1	-0.2422	-0.3712 to -0.1131	Yes	***	0.0003	-0.1099	0.1323	-0.2422	0.02856	2	2	8.479	10
	5:Pt4 vs. 31:Pt4	-0.07457	-0.2036 to 0.05447	No	ns	>0.9999	-0.1099	-0.03531	-0.07457	0.02856	2	2	2.611	10
	10:Pt1 vs. 10:Pt4	0.04642	-0.08261 to 0.1755	No	ns	>0.9999	0.116	0.06962	0.04642	0.02856	2	2	1.626	10
	10:Pt1 vs. 15:Pt1	-0.07113	-0.2002 to 0.05791	No	ns	>0.9999	0.116	0.1872	-0.07113	0.02856	2	2	2.491	10
	10:Pt1 vs. 15:Pt4	-0.01337	-0.1424 to 0.1157	No	ns	>0.9999	0.116	0.1294	-0.01337	0.02856	2	2	0.4682	10
	10:Pt1 vs. 25:Pt1	-0.03961	-0.1687 to 0.08942	No	ns	>0.9999	0.116	0.1557	-0.03961	0.02856	2	2	1.387	10
	10:Pt1 vs. 25:Pt4	0.1354	0.006379 to 0.2645	Yes	*	0.0355	0.116	-0.01938	0.1354	0.02856	2	2	4.742	10
	10:Pt1 vs. 31:Pt1	-0.01624	-0.1453 to 0.1128	No	ns	>0.9999	0.116	0.1323	-0.01624	0.02856	2	2	0.5685	10
	10:Pt1 vs. 31:Pt4	0.1514	0.02231 to 0.2804	Yes	*	0.0156	0.116	-0.03531	0.1514	0.02856	2	2	5.3	10
	10:Pt4 vs. 15:Pt1	-0.1176	-0.2466 to 0.01149	No	ns	0.094	0.06962	0.1872	-0.1176	0.02856	2	2	4.116	10
	10:Pt4 vs. 15:Pt4	-0.0598	-0.1888 to 0.06924	No	ns	>0.9999	0.06962	0.1294	-0.0598	0.02856	2	2	2.094	10
	10:Pt4 vs. 25:Pt1	-0.08604	-0.2151 to 0.04300	No	ns	0.5875	0.06962	0.1557	-0.08604	0.02856	2	2	3.013	10
	10:Pt4 vs. 25:Pt4	0.08899	-0.04005 to 0.2180	No	ns	0.4925	0.06962	-0.01938	0.08899	0.02856	2	2	3.116	10
	10:Pt4 vs. 31:Pt1	-0.06266	-0.1917 to 0.06638	No	ns	>0.9999	0.06962	0.1323	-0.06266	0.02856	2	2	2.194	10
	10:Pt4 vs. 31:Pt4	0.1049	-0.02411 to 0.2340	No	ns	0.1929	0.06962	-0.03531	0.1049	0.02856	2	2	3.674	10
	15:Pt1 vs. 15:Pt4	0.05775	-0.07128 to 0.1868	No	ns	>0.9999	0.1872	0.1294	0.05775	0.02856	2	2	2.022	10
	15:Pt1 vs. 25:Pt1	0.03151	-0.09753 to 0.1605	No	ns	>0.9999	0.1872	0.1557	0.03151	0.02856	2	2	1.103	10
	15:Pt1 vs. 25:Pt4	0.2065	0.07750 to 0.3356	Yes	**	0.0013	0.1872	-0.01938	0.2065	0.02856	2	2	7.232	10
	15:Pt1 vs. 31:Pt1	0.05489	-0.07415 to 0.1839	No	ns	>0.9999	0.1872	0.1323	0.05489	0.02856	2	2	1.922	10
	15:Pt1 vs. 31:Pt4	0.2225	0.09344 to 0.3515	Yes	***	0.0007	0.1872	-0.03531	0.2225	0.02856	2	2	7.79	10
	15:Pt4 vs. 25:Pt1	-0.02624	-0.1553 to 0.1028	No	ns	>0.9999	0.1294	0.1557	-0.02624	0.02856	2	2	0.9189	10
	15:Pt4 vs. 25:Pt4	0.1488	0.01975 to 0.2778	Yes	*	0.0178	0.1294	-0.01938	0.1488	0.02856	2	2	5.21	10
	15:Pt4 vs. 31:Pt1	-0.002864	-0.1319 to 0.1262	No	ns	>0.9999	0.1294	0.1323	-0.002864	0.02856	2	2	0.1003	10
	15:Pt4 vs. 31:Pt4	0.1647	0.03569 to 0.2938	Yes	**	0.0081	0.1294	-0.03531	0.1647	0.02856	2	2	5.768	10
	25:Pt1 vs. 25:Pt4	0.175	0.04599 to 0.3041	Yes	**	0.005	0.1557	-0.01938	0.175	0.02856	2	2	6.129	10
	25:Pt1 vs. 31:Pt1	0.02338	-0.1057 to 0.1524	No	ns	>0.9999	0.1557	0.1323	0.02338	0.02856	2	2	0.8186	10
	25:Pt1 vs. 31:Pt4	0.191	0.06193 to 0.3200	Yes	**	0.0025	0.1557	-0.03531	0.191	0.02856	2	2	6.687	10
	25:Pt4 vs. 31:Pt1	-0.1517	-0.2807 to -0.02262	Yes	*	0.0154	-0.01938	0.1323	-0.1517	0.02856	2	2	5.31	10
	25:Pt4 vs. 31:Pt4	0.01594	-0.1131 to 0.1450	No	ns	>0.9999	-0.01938	-0.03531	0.01594	0.02856	2	2	0.558	10
	31:Pt1 vs. 31:Pt4	0.1676	0.03855 to 0.2966	Yes	**	0.0071	0.1323	-0.03531	0.1676	0.02856	2	2	5.868	10

## Sheet: Salinity experiment - Trial 2
Data from PW growth salinity experiment - Trial 2
Log2 of F0 values measured with Pulsed-Amplitude-Modulation fluorometry
Strain Pt1	Day	0 psu		5 psu		10 psu		15 psu		25 psu		31 psu				Strain Pt4	Day	0 psu		5 psu		10 psu		15 psu		25 psu		31 psu
		Rep 1	Rep 2	Rep 1	Rep 2	Rep 1	Rep 2	Rep 1	Rep 2	Rep 1	Rep 2	Rep 1	Rep 2					Rep 1	Rep 2	Rep 1	Rep 2	Rep 1	Rep 2	Rep 1	Rep 2	Rep 1	Rep 2	Rep 1	Rep 2
	1	7.69349	7.63662	8.61471	8.54303	8.82655	8.75154	8.69349	9.07948	8.70736	8.63662	8.43463	8.45943				1	7.74819	7.62936	7.83289	7.93664	7.56224	7.69349	8.51175	8.49985	8.85487	8.91588	8.27146	8.22882
	2	7.65821	6.39232	9.40301	9.32643	9.70217	9.71939	10.2515	9.86419	9.65821	9.70736	9.31967	9.31967				2	7.70044	7.71425	8.20945	7.49985	7.91289	7.84549	9.46352	9.55842	9.94251	9.98726	8.46352	8.9571
	3	6.32193	7.82018	10.8719	10.8017	11.3454	11.4873	12.1472	12.1183	11.2831	11.144	10.8564	10.8719				3	7.77479	7.62936	9.10852	9.07948	8.31288	8.35315	10.9758	10.8114	11.4873	11.6573	10.1098	10.2633
	4	7.65821	6.56986	12.5066	12.4312	13.0673	13	13.5542	13.5106	12.9828	13.0227	12.5774	12.7574				4	7.65105	7.67243	10.5812	10.4888	9.35535	9.27612	12.7842	12.9054	13.1877	13.3221	11.7932	12.0386
	5	7.6865	7.73471	13.5267	13.4741	14.0284	13.8932	14.1675	14.1156	13.8238	13.8808	13.4616	13.7268				5	7.81378	6.45943	11.6393	11.7482	10.4533	10.4696	13.9268	13.9357	14.165	14.1752	13.1103	13.1676
Exp. Phase range used for calc. of doubling time (day)				2-4	2-5	2-5	2-5	2-5	2-5	2-4	2-4	2-4	2-4			Exp. Phase range used for calc. of doubling time (day)				3-5	2-5	3-5	3-5	2-4	2-4	2-4	2-4	2-4	2-4
Doubling time (k; slope of linear Log2 increase)		could not be calculated		1.5518	1.5524	1.6825	1.6403	1.6514	1.8232	1.6623	1.6577	1.6289	1.7189			Doubling time (k; slope of linear Log2 increase)		could not be calculated	could not be calculated	1.2654	1.4945	1.0702	1.0582	1.6604	1.6735	1.6226	1.6674	1.6648	1.5047
R-squared				0.9991	0.9992	0.9998	0.998	0.9928	0.9817	0.9998	0.9941	0.9989	0.9969			R-squared				0.9911	0.998	0.9998	0.9946	0.9974	0.9794	0.9992	1	1	0.9923
		doubling time (k)				max. growth rate (µ)				log2 of µ
		Pt1		Pt4		Pt1		Pt4		Pt1		Pt4
	5	1.5518	1.5524	1.2654	1.4945	1.07563	1.07604	0.877108	1.03591	0.105176	0.105734	-0.189173	0.0508965
	10	1.6825	1.6403	1.0702	1.0582	1.16622	1.13697	0.741806	0.733488	0.22184	0.185193	-0.430886	-0.447154
	15	1.6514	1.8232	1.6604	1.6735	1.14466	1.26375	1.1509	1.15998	0.194923	0.337706	0.202764	0.214102
	25	1.6623	1.6577	1.6226	1.6674	1.15222	1.14903	1.1247	1.15575	0.204414	0.200417	0.169541	0.208834
	31	1.6289	1.7189	1.6648	1.5047	1.12907	1.19145	1.15395	1.04298	0.175132	0.252719	0.206582	0.0607095
	Post-hoc 2-way ANOVA multiple comparisons test with Bonferroni's correction
	psu:strain vs. psu:strain	Mean Diff.	95.00% CI of diff.	Below threshold?	Summary	Adjusted P Value	Mean 1	Mean 2	Mean Diff.	SE of diff.	N1	N2	t	DF
	5:Pt1 vs. 5:Pt4	0.1746	-0.1584 to 0.5076	No	ns	>0.9999	0.1055	-0.06914	0.1746	0.07369	2	2	2.369	10
	5:Pt1 vs. 10:Pt1	-0.09806	-0.4310 to 0.2349	No	ns	>0.9999	0.1055	0.2035	-0.09806	0.07369	2	2	1.331	10
	5:Pt1 vs. 10:Pt4	0.5445	0.2115 to 0.8774	Yes	**	0.0011	0.1055	-0.439	0.5445	0.07369	2	2	7.388	10
	5:Pt1 vs. 15:Pt1	-0.1609	-0.4938 to 0.1721	No	ns	>0.9999	0.1055	0.2663	-0.1609	0.07369	2	2	2.183	10
	5:Pt1 vs. 15:Pt4	-0.103	-0.4360 to 0.2300	No	ns	>0.9999	0.1055	0.2084	-0.103	0.07369	2	2	1.397	10
	5:Pt1 vs. 25:Pt1	-0.09696	-0.4299 to 0.2360	No	ns	>0.9999	0.1055	0.2024	-0.09696	0.07369	2	2	1.316	10
	5:Pt1 vs. 25:Pt4	-0.08373	-0.4167 to 0.2492	No	ns	>0.9999	0.1055	0.1892	-0.08373	0.07369	2	2	1.136	10
	5:Pt1 vs. 31:Pt1	-0.1085	-0.4414 to 0.2245	No	ns	>0.9999	0.1055	0.2139	-0.1085	0.07369	2	2	1.472	10
	5:Pt1 vs. 31:Pt4	-0.02819	-0.3612 to 0.3048	No	ns	>0.9999	0.1055	0.1336	-0.02819	0.07369	2	2	0.3825	10
	5:Pt4 vs. 10:Pt1	-0.2727	-0.6056 to 0.06032	No	ns	0.1849	-0.06914	0.2035	-0.2727	0.07369	2	2	3.7	10
	5:Pt4 vs. 10:Pt4	0.3699	0.03691 to 0.7029	Yes	*	0.0235	-0.06914	-0.439	0.3699	0.07369	2	2	5.019	10
	5:Pt4 vs. 15:Pt1	-0.3355	-0.6684 to -0.002477	Yes	*	0.0475	-0.06914	0.2663	-0.3355	0.07369	2	2	4.552	10
	5:Pt4 vs. 15:Pt4	-0.2776	-0.6105 to 0.05540	No	ns	0.1657	-0.06914	0.2084	-0.2776	0.07369	2	2	3.767	10
	5:Pt4 vs. 25:Pt1	-0.2716	-0.6045 to 0.06142	No	ns	0.1895	-0.06914	0.2024	-0.2716	0.07369	2	2	3.685	10
	5:Pt4 vs. 25:Pt4	-0.2583	-0.5913 to 0.07465	No	ns	0.2554	-0.06914	0.1892	-0.2583	0.07369	2	2	3.505	10
	5:Pt4 vs. 31:Pt1	-0.2831	-0.6160 to 0.04991	No	ns	0.1467	-0.06914	0.2139	-0.2831	0.07369	2	2	3.841	10
	5:Pt4 vs. 31:Pt4	-0.2028	-0.5358 to 0.1302	No	ns	0.9188	-0.06914	0.1336	-0.2028	0.07369	2	2	2.752	10
	10:Pt1 vs. 10:Pt4	0.6425	0.3096 to 0.9755	Yes	***	0.0002	0.2035	-0.439	0.6425	0.07369	2	2	8.719	10
	10:Pt1 vs. 15:Pt1	-0.0628	-0.3958 to 0.2702	No	ns	>0.9999	0.2035	0.2663	-0.0628	0.07369	2	2	0.8522	10
	10:Pt1 vs. 15:Pt4	-0.004916	-0.3379 to 0.3281	No	ns	>0.9999	0.2035	0.2084	-0.004916	0.07369	2	2	0.06672	10
	10:Pt1 vs. 25:Pt1	0.001101	-0.3319 to 0.3341	No	ns	>0.9999	0.2035	0.2024	0.001101	0.07369	2	2	0.01494	10
	10:Pt1 vs. 25:Pt4	0.01433	-0.3186 to 0.3473	No	ns	>0.9999	0.2035	0.1892	0.01433	0.07369	2	2	0.1944	10
	10:Pt1 vs. 31:Pt1	-0.01041	-0.3434 to 0.3226	No	ns	>0.9999	0.2035	0.2139	-0.01041	0.07369	2	2	0.1412	10
	10:Pt1 vs. 31:Pt4	0.06987	-0.2631 to 0.4028	No	ns	>0.9999	0.2035	0.1336	0.06987	0.07369	2	2	0.9481	10
	10:Pt4 vs. 15:Pt1	-0.7053	-1.038 to -0.3724	Yes	***	0.0001	-0.439	0.2663	-0.7053	0.07369	2	2	9.571	10
	10:Pt4 vs. 15:Pt4	-0.6475	-0.9804 to -0.3145	Yes	***	0.0002	-0.439	0.2084	-0.6475	0.07369	2	2	8.786	10
	10:Pt4 vs. 25:Pt1	-0.6414	-0.9744 to -0.3085	Yes	***	0.0003	-0.439	0.2024	-0.6414	0.07369	2	2	8.704	10
	10:Pt4 vs. 25:Pt4	-0.6282	-0.9612 to -0.2952	Yes	***	0.0003	-0.439	0.1892	-0.6282	0.07369	2	2	8.525	10
	10:Pt4 vs. 31:Pt1	-0.6529	-0.9859 to -0.3200	Yes	***	0.0002	-0.439	0.2139	-0.6529	0.07369	2	2	8.86	10
	10:Pt4 vs. 31:Pt4	-0.5727	-0.9056 to -0.2397	Yes	***	0.0007	-0.439	0.1336	-0.5727	0.07369	2	2	7.771	10
	15:Pt1 vs. 15:Pt4	0.05788	-0.2751 to 0.3909	No	ns	>0.9999	0.2663	0.2084	0.05788	0.07369	2	2	0.7854	10
	15:Pt1 vs. 25:Pt1	0.0639	-0.2691 to 0.3969	No	ns	>0.9999	0.2663	0.2024	0.0639	0.07369	2	2	0.8671	10
	15:Pt1 vs. 25:Pt4	0.07713	-0.2558 to 0.4101	No	ns	>0.9999	0.2663	0.1892	0.07713	0.07369	2	2	1.047	10
	15:Pt1 vs. 31:Pt1	0.05239	-0.2806 to 0.3854	No	ns	>0.9999	0.2663	0.2139	0.05239	0.07369	2	2	0.7109	10
	15:Pt1 vs. 31:Pt4	0.1327	-0.2003 to 0.4656	No	ns	>0.9999	0.2663	0.1336	0.1327	0.07369	2	2	1.8	10
	15:Pt4 vs. 25:Pt1	0.006017	-0.3270 to 0.3390	No	ns	>0.9999	0.2084	0.2024	0.006017	0.07369	2	2	0.08166	10
	15:Pt4 vs. 25:Pt4	0.01925	-0.3137 to 0.3522	No	ns	>0.9999	0.2084	0.1892	0.01925	0.07369	2	2	0.2612	10
	15:Pt4 vs. 31:Pt1	-0.005493	-0.3385 to 0.3275	No	ns	>0.9999	0.2084	0.2139	-0.005493	0.07369	2	2	0.07453	10
	15:Pt4 vs. 31:Pt4	0.07479	-0.2582 to 0.4078	No	ns	>0.9999	0.2084	0.1336	0.07479	0.07369	2	2	1.015	10
	25:Pt1 vs. 25:Pt4	0.01323	-0.3197 to 0.3462	No	ns	>0.9999	0.2024	0.1892	0.01323	0.07369	2	2	0.1795	10
	25:Pt1 vs. 31:Pt1	-0.01151	-0.3445 to 0.3215	No	ns	>0.9999	0.2024	0.2139	-0.01151	0.07369	2	2	0.1562	10
	25:Pt1 vs. 31:Pt4	0.06877	-0.2642 to 0.4017	No	ns	>0.9999	0.2024	0.1336	0.06877	0.07369	2	2	0.9332	10
	25:Pt4 vs. 31:Pt1	-0.02474	-0.3577 to 0.3082	No	ns	>0.9999	0.1892	0.2139	-0.02474	0.07369	2	2	0.3357	10
	25:Pt4 vs. 31:Pt4	0.05554	-0.2774 to 0.3885	No	ns	>0.9999	0.1892	0.1336	0.05554	0.07369	2	2	0.7537	10
	31:Pt1 vs. 31:Pt4	0.08028	-0.2527 to 0.4133	No	ns	>0.9999	0.2139	0.1336	0.08028	0.07369	2	2	1.089	10

## Sheet: PW experiment - Trial 1
Data from PW growth experiment - Trial 1
Cell density (cells per mL culture)														Comments
	Day	McF-PW (0 psu)		McF/EaS-PW (5 psu)		EaS-PW (12 psu)		Control (0 psu)		Control (5 psu)		Control (12 psu)
		Rep 1	Rep 2	Rep 1	Rep 2	Rep 1	Rep 2	Rep 1	Rep 2	Rep 1	Rep 2	Rep 1	Rep 2
	0	100000	100000	100000	100000	100000	100000	100000	100000	100000	100000	100000	100000
	1	40000	27500	170000	195000	215000	205000	10000	35000	195000	275000	337500	375000
	2	105000	142500	320000	400000	640000	930000	57500	57500	585000	640000	1095000	1015000
	3	215000	330000	600000	315000	2260000	2550000	157500	230000	2190000	1840000	4080000	3920000
	4	555000	805000	4210000	3460000	6240000	5900000	360000	395000	8980000	6480000	12350000	14350000
	5	2120000	1930000	15150000	13750000	17250000	15500000	555000	160000	16850000	17600000	25200000	24300000
	6	4820000	5760000	23900000	28900000	27700000	30600000	35000	192500	19300000	28600000	28625000	29500000
	7	9550000	12750000	31250000	34500000	41375000	32000000	635000	935000	30875000	26750000	27125000	30375000
	8	11950000	15550000	34500000	30750000	41500000	43625000	1895000	1850000	29500000	25625000	22625000	23750000
	9	13550000	15850000	38625000	41000000	44875000	42625000	3350000	2270000	32750000	25625000	28875000	26250000
Log-2 of cell density
	Day	McF-PW (0 psu)		McF/EaS-PW (5 psu)		EaS-PW (12 psu)		Control (0 psu)		Control (5 psu)		Control (12 psu)
		Rep 1	Rep 2	Rep 1	Rep 2	Rep 1	Rep 2	Rep 1	Rep 2	Rep 1	Rep 2	Rep 1	Rep 2
	0	16.6096	16.6096	16.6096	16.6096	16.6096	16.6096	16.6096	16.6096	16.6096	16.6096	16.6096	16.6096
	1	15.2877	14.7471	17.3752	17.5731	17.714	17.6453	13.2877	15.0951	17.5731	18.0691	18.3645	18.5165
	2	16.68	17.1206	18.2877	18.6096	19.2877	19.8269	15.8113	15.8113	19.1581	19.2877	20.0625	19.953
	3	17.714	18.3321	19.1946	18.265	21.1079	21.2821	17.265	17.8113	21.0625	20.8113	21.9601	21.9024
	4	19.0821	19.6186	22.0054	21.7223	22.5731	22.4923	18.4576	18.5915	23.0983	22.6276	23.558	23.7745
	5	21.0156	20.8802	23.8528	23.7129	24.0401	23.8858	19.0821	17.2877	24.0062	24.0691	24.5869	24.5345
	6	22.2006	22.4576	24.5105	24.7846	24.7234	24.867	15.0951	17.5545	24.2021	24.7695	24.7708	24.8142
	7	23.1871	23.604	24.8974	25.0401	25.3023	24.9316	19.2764	19.8346	24.8799	24.673	24.6931	24.8564
	8	23.5105	23.8904	25.0401	24.8741	25.3066	25.3787	20.8538	20.8191	24.8142	24.611	24.4314	24.5014
	9	23.6918	23.918	25.203	25.2891	25.4194	25.3452	21.6757	21.1143	24.965	24.611	24.7833	24.6458
Photosynthetic capacity (Fv/Fm)
	Day	McF-PW (0 psu)		McF/EaS-PW (5 psu)		EaS-PW (12 psu)		Control (0 psu)		Control (5 psu)		Control (12 psu)
		Rep 1	Rep 2	Rep 1	Rep 2	Rep 1	Rep 2	Rep 1	Rep 2	Rep 1	Rep 2	Rep 1	Rep 2
	0	0.194	0.182	0.335	0.337	0.347	0.347	0.128	0.171	0.299	0.275	0.346	0.382
	1	0.197	0.261	0.363	0.356	0.415	0.407	0.205	0.134	0.418	0.397	0.465	0.466
	2	0.327	0.389	0.544	0.534	0.547	0.55	0.225	0.231	0.537	0.55	0.556	0.561
	3	0.471	0.506	0.584	0.584	0.594	0.59	0.394	0.431	0.581	0.593	0.59	0.593
	4	0.543	0.566	0.607	0.609	0.617	0.62	0.422	0.521	0.627	0.611	0.589	0.588
	5	0.59	0.605	0.613	0.617	0.615	0.612	0.581	0.511	0.554	0.558	0.447	0.481
	6	0.614	0.618	0.565	0.567	0.579	0.576	0.298	0.532	0.282	0.3	0.196	0.253
	7	0.579	0.582	0.529	0.53	0.532	0.535	0.514	0.603	0.161	0.18	0.152	0.187
	8	0.503	0.482	0.489	0.486	0.521	0.52	0.6	0.574	0.107	0.123	0.121	0.169
	9	0.41	0.388	0.472	0.466	0.51	0.51	0.567	0.54	0.105	0.119	0.115	0.152
Raw values of Nile Red staining (250 microliter samples)
	Day	McF-PW (0 psu)		McF/EaS-PW (5 psu)		EaS-PW (12 psu)		Control (0 psu)		Control (5 psu)		Control (12 psu)
		Rep 1	Rep 2	Rep 1	Rep 2	Rep 1	Rep 2	Rep 1	Rep 2	Rep 1	Rep 2	Rep 1	Rep 2
	0													Empty cells: NR values could not be measured due to low cell desnity and assay sensitivity
	1
	2
	3
	4
	5	1327.47	860	1586	1996.67	8675	12914			7848.67	5890.33	1336	1516.5
	6	901	1501.17	13068.7	12185	5477.33	6076.67			18862.3	18396.3	14932	18634.3
	7	5409	8423.33	15419.3	16182.7	16409.3	16066.7			23764.7	18638	14588	12425.3
	8	14154.3	18435.3	19542.7	24897.3	33778.7	24808	488.833	399.167	33834.7	34140.3	35252.3	35973.3
	9	20055.3	21853	78047.8	50012.1	26244.8	28478	865.083	854.167	72842.4	62725.7	67734.6	55012.4
NR value per cell
	Day	McF-PW (0 psu)		McF/EaS-PW (5 psu)		EaS-PW (12 psu)		Control (0 psu)		Control (5 psu)		Control (12 psu)
		Rep 1	Rep 2	Rep 1	Rep 2	Rep 1	Rep 2	Rep 1	Rep 2	Rep 1	Rep 2	Rep 1	Rep 2
	0
	1
	2
	3
	4
	5	2.50465	1.78238	0.418746	0.580849	2.01159	3.33264			1.86319	1.33871	0.212063	0.24963
	6	0.747718	1.04248	2.18722	1.6865	0.790951	0.794336			3.90929	2.57291	2.08657	2.52669
	7	2.26555	2.64261	1.97367	1.87625	1.5864	2.00833			3.07882	2.78699	2.15123	1.63626
	8	4.73785	4.74221	2.26582	3.23868	3.25577	2.27466	1.03184	0.863063	4.58775	5.32922	6.23245	6.05867
	9	5.92039	5.51496	8.08262	4.87923	2.33937	2.67242	1.03293	1.50514	8.89678	9.79132	9.38315	8.38284
NR value per mL
	Day	McF-PW (0 psu)		McF/EaS-PW (5 psu)		EaS-PW (12 psu)		Control (0 psu)		Control (5 psu)		Control (12 psu)
		Rep 1	Rep 2	Rep 1	Rep 2	Rep 1	Rep 2	Rep 1	Rep 2	Rep 1	Rep 2	Rep 1	Rep 2
	0
	1
	2
	3
	4
	5	0.530987	0.344	0.6344	0.798667	3.47	5.1656			3.13947	2.35613	0.534399	0.606601
	6	0.3604	0.600466	5.22747	4.874	2.19093	2.43067			7.54493	7.35853	5.9728	7.45373
	7	2.1636	3.36933	6.16773	6.47307	6.56373	6.42667			9.50587	7.4552	5.8352	4.97013
	8	5.66173	7.37413	7.81707	9.95893	13.5115	9.9232	0.195533	0.159667	13.5339	13.6561	14.1009	14.3893
	9	8.02213	8.74121	31.2191	20.0049	10.4979	11.3912	0.346033	0.341667	29.137	25.0903	27.0938	22.005

## Sheet: PW experiment - Trial 2
Data from PW growth experiment - Trial 2
Cell density (cells per mL culture)														Comments
	Day	McF-PW (0 psu)		McF/EaS-PW (5 psu)		EaS-PW (12 psu)		Control (0 psu)		Control (5 psu)		Control (12 psu)
		Rep 3	Rep 4	Rep 3	Rep 4	Rep 3	Rep 4	Rep 3	Rep 4	Rep 3	Rep 4	Rep 3	Rep 4
	0	100000	100000	100000	100000	100000	100000	100000	100000	100000	100000	100000	100000
	1	82500	80000	240000	270000	300000	345000	30000	37500	310000	267500	495000	455000
	2	165000	155000	505000	830000	1090000	985000	97500	115000	960000	1110000	1690000	1860000
	3	640000	585000	2000000	3080000	3260000	3100000	295000	422500	3275000	3850000	3850000	5250000
	4	1630000	1900000	6050000	11000000	9700000	8600000	770000	1180000	12950000	10050000	12100000	14400000
	5	4450000	5275000	20125000	28000000	24000000	22375000	1975000	3750000	22875000	21625000	12875000	18375000
	6	12300000	14050000	31375000	40000000	39625000	32500000	7350000	9200000	28750000	27750000	19500000	22000000
	7	22800000	18000000	40750000	36750000	48125000	37500000	15000000	22800000	25875000	26750000	28250000	22750000
	8	24250000	24500000	39875000	47000000	41375000	47000000	20375000	23750000	33375000	24875000	38500000	32875000
	9	24375000	27500000	41125000	49375000	50500000	40750000	24125000	24375000	26625000	28875000	32000000	25125000
Log-2 of cell density
	Day	McF-PW (0 psu)		McF/EaS-PW (5 psu)		EaS-PW (12 psu)		Control (0 psu)		Control (5 psu)		Control (12 psu)
		Rep 3	Rep 4	Rep 3	Rep 4	Rep 3	Rep 4	Rep 3	Rep 4	Rep 3	Rep 4	Rep 3	Rep 4
	0	16.6096	16.6096	16.6096	16.6096	16.6096	16.6096	16.6096	16.6096	16.6096	16.6096	16.6096	16.6096
	1	16.3321	16.2877	17.8727	18.0426	18.1946	18.3962	14.8727	15.1946	18.2419	18.0292	18.9171	18.7955
	2	17.3321	17.2419	18.9459	19.6628	20.0559	19.9098	16.5731	16.8113	19.8727	20.0821	20.6886	20.8269
	3	19.2877	19.1581	20.9316	21.5545	21.6364	21.5638	18.1704	18.6886	21.6431	21.8764	21.8764	22.3239
	4	20.6364	20.8576	22.5285	23.391	23.2096	23.0359	19.5545	20.1704	23.6264	23.2607	23.5285	23.7796
	5	22.0854	22.3307	24.2625	24.7389	24.5165	24.4154	20.9134	21.8385	24.4473	24.3662	23.6181	24.1312
	6	23.5522	23.7441	24.9031	25.2535	25.2399	24.9539	22.8093	23.1332	24.7771	24.726	24.217	24.391
	7	24.4425	24.1015	25.2803	25.1312	25.5203	25.1604	23.8385	24.4425	24.6251	24.673	24.7517	24.4394
	8	24.5315	24.5463	25.249	25.4862	25.3023	25.4862	24.2803	24.5014	24.9923	24.5682	25.1984	24.9705
	9	24.5389	24.7129	25.2935	25.5573	25.5898	25.2803	24.524	24.5389	24.6663	24.7833	24.9316	24.5826
Photosynthetic capacity (Fv/Fm)
	Day	McF-PW (0 psu)		McF/EaS-PW (5 psu)		EaS-PW (12 psu)		Control (0 psu)		Control (5 psu)		Control (12 psu)
		Rep 3	Rep 4	Rep 3	Rep 4	Rep 3	Rep 4	Rep 3	Rep 4	Rep 3	Rep 4	Rep 3	Rep 4
	0													Fv/Fm values were not recorded on the day of innoculation
	1	0.218	0.212	0.434	0.428	0.494	0.513	0.149	0.257	0.407	0.424	0.486	0.492
	2	0.381	0.368	0.556	0.543	0.551	0.565	0.277	0.335	0.515	0.531	0.545	0.562
	3	0.525	0.511	0.585	0.593	0.605	0.606	0.467	0.481	0.575	0.571	0.587	0.595
	4	0.565	0.569	0.61	0.606	0.62	0.618	0.55	0.575	0.61	0.612	0.563	0.56
	5	0.593	0.596	0.6	0.599	0.575	0.596	0.593	0.606	0.464	0.464	0.35	0.374
	6	0.614	0.612	0.585	0.556	0.536	0.532	0.62	0.63	0.246	0.246	0.164	0.203
	7	0.537	0.535	0.534	0.484	0.483	0.449	0.622	0.591	0.151	0.18	0.121	0.178
	8	0.417	0.402	0.476	0.422	0.431	0.401	0.506	0.416	0.123	0.136	0.12	0.15
	9	0.356	0.326	0.435	0.396	0.378	0.357	0.311	0.263	0.119	0.145	0.115	0.16
Raw values of Nile Red staining (250 microliter samples)
	Day	McF-PW (0 psu)		McF/EaS-PW (5 psu)		EaS-PW (12 psu)		Control (0 psu)		Control (5 psu)		Control (12 psu)
		Rep 3	Rep 4	Rep 3	Rep 4	Rep 3	Rep 4	Rep 3	Rep 4	Rep 3	Rep 4	Rep 3	Rep 4
	0													Empty cells: NR values could not be measured due to low cell desnity and assay sensitivity
	1
	2
	3			385.75	438.75	537.5	599.5			845	796.75	770.5	816.25
	4	437.75	442.75	2204	2253	2252.67	2082.67			2418.67	2329	3701.67	3602
	5	1060	850.667	4938.33	6144.33	4226	3815	531.333	599.167	13961.3	12028	15966	15464.7
	6	3640.33	3949.33	13931.3	16465	10015.7	9562.67	1959	2117.67	23912.3	22395	21621	21875.3
	7	14959.7	16610.7	25976.3	29788	20247.3	18585.3	4146.67	6713.67	36561.3	35259.3	31919	32803.7
	8	25270	20828.7	34163	37103	28145	26790	16781.7	18992.7	39444.7	36922.7	35008.7	32586.3
	9	35130	37068.7	47166.7	50930.7	36277	33375.3	34068	36014	50588.3	50570.3	36285.7	38063.3
Relative NR value per cell
	Day	McF-PW (0 psu)		McF/EaS-PW (5 psu)		EaS-PW (12 psu)		Control (0 psu)		Control (5 psu)		Control (12 psu)
		Rep 3	Rep 4	Rep 3	Rep 4	Rep 3	Rep 4	Rep 3	Rep 4	Rep 3	Rep 4	Rep 3	Rep 4
	0
	1
	2
	3			0.7715	0.569805	0.659509	0.773548			1.03206	0.827792	0.800519	0.621905
	4	1.07423	0.932105	1.45719	0.819273	0.928935	0.968682			0.747079	0.926965	1.22369	1.00056
	5	0.952809	0.645055	0.981532	0.877762	0.704333	0.682011	1.07612	0.639111	2.44133	2.22483	4.96031	3.36646
	6	1.18385	1.12437	1.77611	1.6465	1.01105	1.17694	1.06612	0.920725	3.32693	3.22811	4.43508	3.97733
	7	2.6245	3.69126	2.54982	3.24223	1.6829	1.98244	1.10578	1.17784	5.65199	5.27242	4.5195	5.76768
	8	4.16825	3.4006	3.42701	3.1577	2.72097	2.28	3.29456	3.19876	4.72745	5.93731	3.63726	3.96488
	9	5.76492	5.39181	4.58764	4.12603	2.87343	3.27611	5.64858	5.90999	7.60013	7.00541	4.53571	6.05983
Relative NR value per mL
	Day	McF-PW (0 psu)		McF/EaS-PW (5 psu)		EaS-PW (12 psu)		Control (0 psu)		Control (5 psu)		Control (12 psu)
		Rep 3	Rep 4	Rep 3	Rep 4	Rep 3	Rep 4	Rep 3	Rep 4	Rep 3	Rep 4	Rep 3	Rep 4
	0
	1
	2
	3			0.1543	0.1755	0.215	0.2398			0.338	0.3187	0.3082	0.3265
	4	0.1751	0.1771	0.8816	0.9012	0.901067	0.833067			0.967467	0.9316	1.48067	1.4408
	5	0.424	0.340267	1.97533	2.45773	1.6904	1.526	0.212533	0.239667	5.58453	4.8112	6.3864	6.18587
	6	1.45613	1.57973	5.57253	6.586	4.00627	3.82507	0.7836	0.847067	9.56493	8.958	8.6484	8.75013
	7	5.98387	6.64427	10.3905	11.9152	8.09893	7.43413	1.65867	2.68547	14.6245	14.1037	12.7676	13.1215
	8	10.108	8.33147	13.6652	14.8412	11.258	10.716	6.71267	7.59707	15.7779	14.7691	14.0035	13.0345
	9	14.052	14.8275	18.8667	20.3723	14.5108	13.3501	13.6272	14.4056	20.2353	20.2281	14.5143	15.2253

## Sheet: PW Growth rate comparison
Growth rate analysis comparison in PW media (both trial 1 and trial 2)
		PW												Control
		McF (0 psu)				McF / EaS (5 psu)				EaS (12 psu)				Control (0 psu)				Control (5 psu)				Control (12 psu)
Log2 (Cell density)		trial 1		trial 2		trial 1		trial 2		trial 1		trial 2		trial 1		trial 2		trial 1		trial 2		trial 1		trial 2
	Day	Rep 1	Rep 2	Rep 3	Rep 4	Rep 1	Rep 2	Rep 3	Rep 4	Rep 1	Rep 2	Rep 3	Rep 4	Rep 1	Rep 2	Rep 3	Rep 4	Rep 1	Rep 2	Rep 3	Rep 4	Rep 1	Rep 2	Rep 3	Rep 4
	0	16.6096	16.6096	16.6096	16.6096	16.6096	16.6096	16.6096	16.6096	16.6096	16.6096	16.6096	16.6096	16.6096	16.6096	16.6096	16.6096	16.6096	16.6096	16.6096	16.6096	16.6096	16.6096	16.6096	16.6096
	1	15.2877	14.7471	16.3321	16.2877	17.3752	17.5731	17.8727	18.0426	17.714	17.6453	18.1946	18.3962	13.2877	15.0951	14.8727	15.1946	17.5731	18.0691	18.2419	18.0292	18.3645	18.5165	18.9171	18.7955
	2	16.68	17.1206	17.3321	17.2419	18.2877	18.6096	18.9459	19.6627	19.2877	19.8269	20.0559	19.9098	15.8113	15.8113	16.5731	16.8113	19.1581	19.2877	19.8727	20.0821	20.0625	19.9531	20.6886	20.8269
	3	17.714	18.3321	19.2877	19.1581	19.1946	18.265	20.9316	21.5545	21.1079	21.2821	21.6364	21.5638	17.265	17.8113	18.1704	18.6886	21.0625	20.8113	21.6431	21.8764	21.9601	21.9024	21.8764	22.3239
	4	19.0821	19.6186	20.6364	20.8576	22.0054	21.7223	22.5285	23.391	22.5731	22.4923	23.2096	23.0359	18.4576	18.5915	19.5545	20.1704	23.0983	22.6276	23.6264	23.2607	23.558	23.7746	23.5285	23.7796
	5	21.0156	20.8802	22.0854	22.3307	23.8528	23.7129	24.2625	24.7389	24.0401	23.8858	24.5165	24.4154	19.0821	17.2877	20.9134	21.8385	24.0063	24.0691	24.4473	24.3662	24.5869	24.5344	23.6181	24.1312
	6	22.2006	22.4576	23.5522	23.7441	24.5105	24.7846	24.9031	25.2535	24.7234	24.867	25.2399	24.9539	15.0951	17.5545	22.8093	23.1332	24.2021	24.7695	24.7771	24.726	24.7708	24.8142	24.217	24.391
	7	23.1871	23.604	24.4425	24.1015	24.8973	25.0401	25.2803	25.1312	25.3023	24.9316	25.5203	25.1604	19.2764	19.8346	23.8385	24.4425	24.8799	24.673	24.6251	24.673	24.6931	24.8564	24.7518	24.4394
	8	23.5105	23.8904	24.5315	24.5463	25.0401	24.8741	25.249	25.4862	25.3066	25.3787	25.3023	25.4862	20.8538	20.8191	24.2803	24.5014	24.8142	24.611	24.9923	24.5682	24.4314	24.5014	25.1984	24.9705
	9	23.6918	23.918	24.5389	24.7129	25.203	25.2891	25.2935	25.5573	25.4194	25.3452	25.5898	25.2803	21.6757	21.1143	24.524	24.5389	24.965	24.611	24.6663	24.7833	24.7833	24.6458	24.9316	24.5826
Exponential phase range (days)		1-6	1-7	2-6	1-6	1-5	1-6	1-4	0-5	1-5	2-5	2-5	0-4	1-5	1-5	2-5	2-5	1-4	1-4	1-4	1-5	1-4	1-4	1-4	1-4
Doubling time (k; slope of linear Log2 increase)		1.3983	1.4212	1.4774	1.5499	1.6673	1.5664	1.6262	1.6738	1.5938	1.4257	1.66625	1.602	1.4235	0.7166	1.4405	1.6563	1.848	1.5199	1.6165	1.7489	1.7478	1.7723	1.5022	1.6449
R-squared		0.9932	0.9901	0.996	0.9948	0.9509	0.9166	0.9937	0.9976	0.9983	0.9902	0.9982	0.999	0.9432	0.6199	0.9985	0.998	0.9969	0.9923	0.9981	0.9927	0.999	0.9959	0.9948	0.993
Summary
		doubling time (k)								growth rate (µ)
		PW				Control				PW				Control
		trial 1		trial 2		trial 1		trial 2		trial 1		trial 2		trial 1		trial 2
		Rep 1	Rep 2	Rep 3	Rep 4	Rep 1	Rep 2	Rep 3	Rep 4	Rep 1	Rep 2	Rep 3	Rep 4	Rep 1	Rep 2	Rep 3	Rep 4
McF (0 psu)		1.3983	1.4212	1.4774	1.5499	1.4235		1.4405	1.6563	0.969228	0.985101	1.02406	1.07431	0.986695		0.998479	1.14806
McF / EaS (5 psu)		1.6673	1.5664	1.6262	1.6738	1.848	1.5199	1.6165	1.7489	1.15568	1.08575	1.1272	1.16019	1.28094	1.05351	1.12047	1.21225
EaS (12 psu)		1.5938	1.4257	1.66625	1.602	1.7478	1.7723	1.5022	1.6449	1.10474	0.98822	1.15496	1.11042	1.21148	1.22846	1.04125	1.14016
Log10 of growth rate (µ) used for ANOVA		Log10 of growth rate (µ) used for ANOVA
		PW				Control
		trial 1		trial 2		trial 1		trial 2
		Rep 1	Rep 2	Rep 3	Rep 4	Rep 1	Rep 2	Rep 3	Rep 4
		-0.0135742	-0.00651934	0.0103236	0.0311291	-0.00581707		-0.000661276	0.0599645
		0.0628392	0.0357281	0.0519994	0.064529	0.107527	0.0226405	0.0494012	0.0835904
		0.0432593	-0.00514639	0.0625656	0.045488	0.0833172	0.0893627	0.0175532	0.056965
Post-hoc 2-way ANOVA multiple comparisons test with Bonferroni's correction
Comparison: PW-media vs Control media
			95% CI of diff.	P < 0.05?	Significance	Adj. P Value
		McF (0 psu)	-0.07135 to 0.04638	No	ns	>0.9999
		McF / EaS (5 psu)	-0.06651 to 0.04248	No	ns	>0.9999
		EaS (12 psu)	-0.07976 to 0.02924	No	ns	0.7057
Test details
			N1	N2	t	DF
		McF (0 psu)	4	3	0.5632	17
		McF / EaS (5 psu)	4	4	0.5854	17
		EaS (12 psu)	4	4	1.231	17
Normality Test outcome
		Compare normal and lognormal
		Probability normal (Gaussian)	48.27%
		Probability lognormal	51.73%
		Likelihood ratio (LR)	0.9332
		1/LR	1.072
		Which distribution is more likely?	Lognormal
		D'Agostino & Pearson test
		K2	0.8643
		P value	0.6491
		Passed normality test (alpha=0.05)?	Yes
		P value summary	ns

## Sheet: PW Cell yield comparison
Cell yield analysis comparison in PW media (both trial 1 and trial 2)
Cell densities of both trials
				trial 1		trial 2		trial 1		trial 2		trial 1		trial 2		trial 1		trial 2		trial 1		trial 2		trial 1		trial 2
			Time (days)	McF (0 psu) - R1	McF (0 psu) - R2	McF (0 psu) - R3	McF (0 psu) - R4	McF / EaS (5 psu) -R1	McF / EaS (5 psu) -R2	McF / EaS (5 psu) -R3	McF / EaS (5 psu) -R4	EaS (12 psu) - R1	EaS (12 psu) - R2	EaS (12 psu) - R3	EaS (12 psu) - R4	Control (0 psu) - R1	Control (0 psu) - R2	Control (0 psu) - R3	Control (0 psu) - R4	Control (5 psu) - R1	Control (5 psu) - R2	Control (5 psu) - R3	Control (5 psu) - R4	Control (12 psu) - R1	Control (12 psu) - R2	Control (12 psu) - R3	Control (12 psu) - R4
			0	100000	100000	100000	100000	100000	100000	100000	100000	100000	100000	100000	100000	100000	100000	100000	100000	100000	100000	100000	100000	100000	100000	100000	100000
			1	40000	27500	82500	80000	170000	195000	240000	270000	215000	205000	300000	345000	10000	35000	30000	37500	195000	275000	310000	267500	337500	375000	495000	455000
			2	105000	142500	165000	155000	320000	400000	505000	830000	640000	930000	1090000	985000	57500	57500	97500	115000	585000	640000	960000	1110000	1095000	1015000	1690000	1860000
			3	215000	330000	640000	585000	600000	315000	2000000	3080000	2260000	2550000	3260000	3100000	157500	230000	295000	422500	2190000	1840000	3275000	3850000	4080000	3920000	3850000	5250000
			4	555000	805000	1630000	1900000	4210000	3460000	6050000	11000000	6240000	5900000	9700000	8600000	360000	395000	770000	1180000	8980000	6480000	12950000	10050000	12350000	14350000	12100000	14400000
			5	2120000	1930000	4450000	5275000	15150000	13750000	20125000	28000000	17250000	15500000	24000000	22375000	555000	160000	1975000	3750000	16850000	17600000	22875000	21625000	25200000	24300000	12875000	18375000
			6	4820000	5760000	12300000	14050000	23900000	28900000	31375000	40000000	27700000	30600000	39625000	32500000	35000	192500	7350000	9200000	19300000	28600000	28750000	27750000	28625000	29500000	19500000	22000000
			7	9550000	12750000	22800000	18000000	31250000	34500000	40750000	36750000	41375000	32000000	48125000	37500000	635000	935000	15000000	22800000	30875000	26750000	25875000	26750000	27125000	30375000	28250000	22750000
			8	11950000	15550000	24250000	24500000	34500000	30750000	39875000	47000000	41500000	43625000	41375000	47000000	1895000	1850000	20375000	23750000	29500000	25625000	33375000	24875000	22625000	23750000	38500000	32875000
			9	13550000	15850000	24375000	27500000	38625000	41000000	41125000	49375000	44875000	42625000	50500000	40750000	3350000	2270000	24125000	24375000	32750000	25625000	26625000	28875000	28875000	26250000	32000000	25125000
Yield summary (Cell densities on day 9) used for ANOVA
				PW				Control
				trial 1		trial 2		trial 1		trial 2
				Rep 1	Rep 2	Rep 3	Rep 4	Rep 1	Rep 2	Rep 3	Rep 4
			McF (0 psu)	13550000	15850000	24375000	27500000	3350000	2270000	24125000	24375000
			McF / EaS (5 psu)	38625000	41000000	41125000	49375000	32750000	25625000	26625000	28875000
			EaS (12 psu)	44875000	42625000	50500000	40750000	28875000	26250000	32000000	25125000
Post-hoc 2-way ANOVA multiple comparisons test with Bonferroni's correction
Comparison: PW-media vs Control media
				Mean Diff.	95% CI of diff.	P < 0.05?	Significance	Adj. P Value
			McF (0 psu)	6788750	-5433843 to 19011343	No	ns	0.4798
			McF / EaS (5 psu)	14062500	1839907 to 26285093	Yes	*	0.0213
			EaS (12 psu)	16625000	4402407 to 28847593	Yes	**	0.0063
Test details
				N1	N2	t	DF
			McF (0 psu)	4	4	1.466	18
			McF / EaS (5 psu)	4	4	3.036	18
			EaS (12 psu)	4	4	3.59	18
Normality Test outcome
		Probability normal (Gaussian)	99.99%
		Probability lognormal	0.00946%
		Likelihood ratio (LR)	10570
		1/LR	9.461e-05
		Which distribution is more likely?	Normal
		D'Agostino & Pearson test
		K2	0.9045
		P value	0.6362
		Passed normality test (alpha=0.05)?	Yes
		P value summary	ns

## Sheet: PW Nile Red comparison
Nile Red based lipid accumulation comparison in PW media (both trial 1 and trial 2)
NR fluo. / cell
	PW												Control
	McF (0 psu)				McF / EaS (5 psu)				EaS (12 psu)				Control (0 psu)				Control (5 psu)				Control (12 psu)
	trial 1		trial 2		trial 1		trial 2		trial 1		trial 2		trial 1		trial 2		trial 1		trial 2		trial 1		trial 2
Day	Rep 1	Rep 2	Rep 3	Rep 4	Rep 1	Rep 2	Rep 3	Rep 4	Rep 1	Rep 2	Rep 3	Rep 4	Rep 1	Rep 2	Rep 3	Rep 4	Rep 1	Rep 2	Rep 3	Rep 4	Rep 1	Rep 2	Rep 3	Rep 4
0
1
2
3							0.7715	0.569805			0.659509	0.773548							1.03206	0.827792			0.800519	0.621905
4			1.07423	0.932105			1.45719	0.819273			0.928935	0.968682							0.747079	0.926965			1.22369	1.00056
5	2.50465	1.78238	0.952809	0.645055	0.418746	0.580849	0.981532	0.877762	2.01159	3.33264	0.704333	0.682011			1.07612	0.639111	1.86319	1.33871	2.44133	2.22483	0.212063	0.24963	4.96031	3.36646
6	0.747718	1.04248	1.18385	1.12437	2.18722	1.6865	1.77611	1.6465	0.790951	0.794336	1.01105	1.17694			1.06612	0.920725	3.90929	2.57291	3.32693	3.22811	2.08657	2.52669	4.43508	3.97733
7	2.26555	2.64261	2.6245	3.69126	1.97367	1.87625	2.54982	3.24223	1.5864	2.00833	1.6829	1.98244	1.03184	0.863063	1.10578	1.17784	3.07882	2.78699	5.65199	5.27242	2.15123	1.63626	4.5195	5.76768
8	4.73785	4.74221	4.16825	3.4006	2.26582	3.23868	3.42701	3.1577	3.25577	2.27466	2.72097	2.28	1.03293	1.50514	3.29456	3.19876	4.58775	5.32922	4.72745	5.93731	6.23245	6.05867	3.63726	3.96488
9	5.92039	5.51496	5.76492	5.39181	8.08262	4.87923	4.58764	4.12603	2.33937	2.67242	2.87343	3.27611			5.64858	5.90999	8.89678	9.79132	7.60013	7.00541	9.38315	8.38284	4.53571	6.05983
Log 2 of NR fluo. / cell
	PW												Control
	McF (0 psu)				McF / EaS (5 psu)				EaS (12 psu)				Control (0 psu)				Control (5 psu)				Control (12 psu)
	trial 1		trial 2		trial 1		trial 2		trial 1		trial 2		trial 1		trial 2		trial 1		trial 2		trial 1		trial 2
Day	Rep 1	Rep 2	Rep 3	Rep 4	Rep 1	Rep 2	Rep 3	Rep 4	Rep 1	Rep 2	Rep 3	Rep 4	Rep 1	Rep 2	Rep 3	Rep 4	Rep 1	Rep 2	Rep 3	Rep 4	Rep 1	Rep 2	Rep 3	Rep 4
0
1
2
3							-0.374262	-0.811459			-0.600535	-0.370437							0.0455283	-0.272659			-0.320992	-0.685234
4			0.103307	-0.101435			0.543189	-0.287584			-0.106351	-0.0459047							-0.420668	-0.109413			0.29124	0.000801275
5	1.32461	0.833808	-0.0697411	-0.632505	-1.25585	-0.783765	-0.0268927	-0.188098	1.00834	1.73667	-0.50567	-0.552133			0.105836	-0.645861	0.897771	0.420846	1.28766	1.1537	-2.23744	-2.00214	2.31043	1.75123
6	-0.419434	0.0600149	0.243484	0.169111	1.1291	0.754037	0.828718	0.719403	-0.338341	-0.332179	0.0158475	0.235045			0.0923731	-0.119158	1.96691	1.3634	1.73419	1.69069	1.06113	1.33725	2.14896	1.9918
7	1.17986	1.40197	1.39204	1.88411	0.980884	0.907853	1.3504	1.69699	0.665757	1.006	0.750945	0.987274	0.0452165	-0.212462	0.145061	0.236139	1.62238	1.47871	2.49876	2.39847	1.10516	0.7104	2.17616	2.52799
8	2.24423	2.24556	2.05944	1.76579	1.18003	1.69541	1.77695	1.65888	1.703	1.18565	1.44412	1.18903	0.0467495	0.589898	1.72009	1.67751	2.19779	2.41392	2.24106	2.56981	2.6398	2.599	1.86285	1.98728
9	2.56569	2.46335	2.5273	2.43077	3.01482	2.28665	2.19775	2.04475	1.22612	1.41815	1.52277	1.71198			2.49789	2.56316	3.15328	3.2915	2.92602	2.80847	3.23007	3.06744	2.18133	2.59928
Day 9 Values (NR fluo. / cell)
		PW				Control
		trial 1		trial 2		trial 1		trial 2
		Rep 1	Rep 2	Rep 3	Rep 4	Rep 1	Rep 2	Rep 3	Rep 4
McF (0 psu)		5.92039	5.51496	5.76492	5.39181			5.64858	5.90999
McF / EaS (5 psu)		8.08262	4.87923	4.58764	4.12603	8.89678	9.79132	7.60013	7.00541
EaS (12 psu)		2.33937	2.67242	2.87343	3.27611	9.38315	8.38284	4.96031	6.05983
Log 2 of Day 9 Values used for ANOVA (NR fluo. / cell)
		PW				Control
		trial 1		trial 2		trial 1		trial 2
		Rep 1	Rep 2	Rep 3	Rep 4	Rep 1	Rep 2	Rep 3	Rep 4
McF (0 psu)		2.56569	2.46335	2.5273	2.43077			2.49789	2.56316
McF / EaS (5 psu)		3.01482	2.28665	2.19775	2.04475	3.15328	3.2915	2.92602	2.80847
EaS (12 psu)		1.22612	1.41815	1.52277	1.71198	3.23007	3.06744	2.31043	2.59928
NR fluo. / mL
	PW												Control
	McF (0 psu)				McF / EaS (5 psu)				EaS (12 psu)				Control (0 psu)				Control (5 psu)				Control (12 psu)
	trial 1		trial 2		trial 1		trial 2		trial 1		trial 2		trial 1		trial 2		trial 1		trial 2		trial 1		trial 2
Day	Rep 1	Rep 2	Rep 3	Rep 4	Rep 1	Rep 2	Rep 3	Rep 4	Rep 1	Rep 2	Rep 3	Rep 4	Rep 1	Rep 2	Rep 3	Rep 4	Rep 1	Rep 2	Rep 3	Rep 4	Rep 1	Rep 2	Rep 3	Rep 4
0
1
2
3							0.1543	0.1755			0.215	0.2398							0.338	0.3187			0.3082	0.3265
4			0.1751	0.1771			0.8816	0.9012			0.901067	0.833067							0.967467	0.9316			1.48067	1.4408
5	0.530987	0.344	0.424	0.340267	0.6344	0.798667	1.97533	2.45773	3.47	5.1656	1.6904	1.526			0.212533	0.239667	3.13947	2.35613	5.58453	4.8112	0.534399	0.606601	6.3864	6.18587
6	0.3604	0.600466	1.45613	1.57973	5.22747	4.874	5.57253	6.586	2.19093	2.43067	4.00627	3.82507			0.7836	0.847067	7.54493	7.35853	9.56493	8.958	5.9728	7.45373	8.6484	8.75013
7	2.1636	3.36933	5.98387	6.64427	6.16773	6.47307	10.3905	11.9152	6.56373	6.42667	8.09893	7.43413	0.195533	0.159667	1.65867	2.68547	9.50587	7.4552	14.6245	14.1037	5.8352	4.97013	12.7676	13.1215
8	5.66173	7.37413	10.108	8.33147	7.81707	9.95893	13.6652	14.8412	13.5115	9.9232	11.258	10.716	0.346033	0.341667	6.71267	7.59707	13.5339	13.6561	15.7779	14.7691	14.1009	14.3893	14.0035	13.0345
9	8.02213	8.74121	14.052	14.8275	31.2191	20.0049	18.8667	20.3723	10.4979	11.3912	14.5108	13.3501			13.6272	14.4056	29.137	25.0903	20.2353	20.2281	27.0938	22.005	14.5143	15.2253
Log 2 of NR fluo. / mL
	PW												Control
	McF (0 psu)				McF / EaS (5 psu)				EaS (12 psu)				Control (0 psu)				Control (5 psu)				Control (12 psu)
	trial 1		trial 2		trial 1		trial 2		trial 1		trial 2		trial 1		trial 2		trial 1		trial 2		trial 1		trial 2
Day	Rep 1	Rep 2	Rep 3	Rep 4	Rep 1	Rep 2	Rep 3	Rep 4	Rep 1	Rep 2	Rep 3	Rep 4	Rep 1	Rep 2	Rep 3	Rep 4	Rep 1	Rep 2	Rep 3	Rep 4	Rep 1	Rep 2	Rep 3	Rep 4
0
1
2
3							-2.69619	-2.51046			-2.21759	-2.0601							-1.5649	-1.64973			-1.69806	-1.61485
4			-2.51375	-2.49736			-0.181804	-0.150081			-0.150294	-0.263496							-0.0477161	-0.102217			0.566247	0.52687
5	-0.913252	-1.53952	-1.23786	-1.55526	-0.656535	-0.324333	0.982096	1.29733	1.79494	2.36894	0.757365	0.609755			-2.23424	-2.0609	1.65052	1.23642	2.48144	2.2664	-0.904011	-0.72118	2.675	2.62898
6	-1.47233	-0.735844	0.542142	0.659681	2.38611	2.28511	2.47833	2.7194	1.13155	1.28135	2.00226	1.93548			-0.351811	-0.239453	2.91551	2.87942	3.25775	3.16318	2.57841	2.89796	3.11243	3.12931
7	1.11343	1.75246	2.58108	2.73211	2.62474	2.69445	3.3772	3.57473	2.71452	2.68407	3.01773	2.89416	-2.35451	-2.64687	0.730024	1.42517	3.24882	2.89825	3.87032	3.81801	2.54478	2.31328	3.67442	3.71386
8	2.50124	2.88247	3.33743	3.05857	2.96663	3.31599	3.77243	3.89154	3.75611	3.31081	3.49288	3.42169	-1.53102	-1.54934	2.74689	2.92544	3.7585	3.77148	3.97983	3.88451	3.81772	3.84693	3.80771	3.70427
9	3.00399	3.12783	3.8127	3.8902	4.96436	4.32228	4.23777	4.34853	3.39203	3.50985	3.85906	3.73878			3.76842	3.84856	4.86478	4.64906	4.3388	4.33829	4.75989	4.45976	3.8594	3.9284
Day 9 Values (NR fluo. / mL)
		PW				Control
		trial 1		trial 2		trial 1		trial 2
		Rep 1	Rep 2	Rep 3	Rep 4	Rep 1	Rep 2	Rep 3	Rep 4
McF (0 psu)		8.02213	8.74121	14.052	14.8275			13.6272	14.4056
McF / EaS (5 psu)		31.2191	20.0049	18.8667	20.3723	29.137	25.0903	20.2353	20.2281
EaS (12 psu)		10.4979	11.3912	14.5108	13.3501	27.0938	22.005	14.5143	15.2253
Log of Day values (NR fluo. / mL) used for ANOVA
		PW				Control
		trial 1		trial 2		trial 1		trial 2
		Rep 1	Rep 2	Rep 3	Rep 4	Rep 1	Rep 2	Rep 3	Rep 4
McF (0 psu)		3.00399	3.12783	3.8127	3.8902			3.76842	3.84856
McF / EaS (5 psu)		4.96436	4.32228	4.23777	4.34853	4.86478	4.64906	4.3388	4.33829
EaS (12 psu)		3.39203	3.50985	3.85906	3.73878	4.75989	4.45976	3.8594	3.9284
Post-hoc 2-way ANOVA multiple comparisons test with Bonferroni's correction
Comparison: Day 9 NR fluo. / cell between PW-media and respective Control media (Log2 normalized data)													Comparison: Day 9 NR fluo. / mL between PW-media and respective Control media (Log2 normalized data)
		Bonferroni's multiple comparisons test	Predicted (LS) mean diff.	95% CI of diff.	P < 0.05?	Significance	Adj. P Value								Bonferroni's multiple comparisons test	Predicted (LS) mean diff.	95% CI of diff.	P < 0.05?	Significance	Adj. P Value
		McF (0 psu)	-0.03374	-0.7119 to 0.6444	No	ns	>0.9999								McF (0 psu)	-0.3498	-1.139 to 0.4393	No	ns	0.7601
		McF / EaS (5 psu)	-0.6588	-1.213 to -0.1051	Yes	*	0.0174								McF / EaS (5 psu)	-0.0795	-0.7238 to 0.5648	No	ns	>0.9999
		EaS (12 psu)	-1.332	-1.886 to -0.7784	Yes	****	<0.0001								EaS (12 psu)	-0.6269	-1.271 to 0.01740	No	ns	0.0579
Test details
		Test details	N1	N2	t	DF									Test details	N1	N2	t	DF
		McF (0 psu)	4	2	0.133	16									McF (0 psu)	4	2	1.185	16
		McF / EaS (5 psu)	4	4	3.181	16									McF / EaS (5 psu)	4	4	0.3298	16
		EaS (12 psu)	4	4	6.431	16									EaS (12 psu)	4	4	2.601	16
